# Supplementary material for: Bioprospection of the Antarctic Diatoms Craspedostauros ineffabilis IMA082A and Craspedostauros zucchelli IMA088A
Source: MDPI journal article supplement (doi:10.3390/md22010035), 2024-01-06
Supplement: s1 [file s1]

**Table S6.** Fatty acid profiles of *C. ineffabilis* IMA082A and *C. zucchelli* IMA088A. The results are expressed as fatty acid methyl ester percentage. Values represent the mean  $\pm$  standard error of mean (SEM) performed three times (n = 3); nd: not detected. <sup>1</sup> $\Sigma$  SFA: Saturated fatty acids; <sup>2</sup> $\Sigma$  MUFA: Monounsaturated fatty acids; <sup>3</sup> $\Sigma$  PUFA: Polyunsaturated fatty acids. Asterisks indicate statistically significant differences ('\*\*\*' = p-value < 0.001; '\*\*' = p-value < 0.01 and '\*' = p-value < 0.05).

| FAME                       | <i>C. ineffabilis</i><br>IMA082A | <i>C. zucchelli</i><br>IMA088A | p-value     |
|----------------------------|----------------------------------|--------------------------------|-------------|
| C14:0                      | 10,12 $\pm$ 0,19                 | 8,88 $\pm$ 0,22                | 0.002 **    |
| C16:1                      | 33,60 $\pm$ 0,26                 | 24,97 $\pm$ 1,40               | < 0.001 *** |
| C16:0                      | 19,31 $\pm$ 0,28                 | 23,64 $\pm$ 0,45               | < 0.001 *** |
| C18:3                      | 5,13 $\pm$ 0,35                  | 7,71 $\pm$ 0,11                | < 0.001 *** |
| C18:2                      | 3,36 $\pm$ 0,41                  | 4,58 $\pm$ 0,39                | 0.020 *     |
| C18:1                      | 0,95 $\pm$ 0,026                 | 0,85 $\pm$ 0,47                | 0.725       |
| C18:0                      | 1,72 $\pm$ 0,05                  | 3,60 $\pm$ 0,11                | < 0.001 *** |
| C20:4n-6                   | 22,30 $\pm$ 0,39                 | 16,47 $\pm$ 0,29               | < 0.001 *** |
| C22:6n-3                   | 1,49 $\pm$ 0,14                  | 1,85 $\pm$ 0,25                | 0.095       |
| C22:0                      | nd                               | 0,80 $\pm$ 0,15                | –           |
| C24:1                      | 1,77 $\pm$ 0,10                  | 5,04 $\pm$ 0,39                | < 0.001 *** |
| C24:0                      | 0,28 $\pm$ 0,01                  | 1,62 $\pm$ 0,23                | < 0.001 *** |
| $\Sigma$ SFA <sup>1</sup>  | 31,42 $\pm$ 0,11                 | 38,54 $\pm$ 0,58               | < 0.001 *** |
| $\Sigma$ MUFA <sup>2</sup> | 36,32 $\pm$ 0,37                 | 30,86 $\pm$ 0,85               | < 0.001 *** |
| $\Sigma$ PUFA <sup>3</sup> | 32,28 $\pm$ 0,29                 | 30,60 $\pm$ 0,55               | 0.009 **    |
