# Supplementary material for: Bioprospection of the Antarctic Diatoms Craspedostauros ineffabilis IMA082A and Craspedostauros zucchelli IMA088A
Source: MDPI journal article supplement (doi:10.3390/md22010035), 2024-01-06
Supplement: s1 [file s1]

**Table S2.** Enzymatic inhibitory properties of the acetone and methanol extracts *C. ineffabilis* IMA082A and *C. zucchelli* IMA088A. Results are expressed as inhibitory activity (% of inhibition) at the concentration of 10 mg/mL. For the same column, different letters indicate significant differences (Multiple Comparisons of Means: Tukey Contrast, 95% family-wise confidence level). Values represent the mean  $\pm$  standard error of mean (SEM) performed six times (n = 6); \* positive control tested at 1 mg/ml; \*\* positive control tested at 10 mg/mL.

| Species                          | Extract      | AChE              | BChE              | $\alpha$ -glucosidase | $\alpha$ -amylase | Lipase             | Tyrosinase        |
|----------------------------------|--------------|-------------------|-------------------|-----------------------|-------------------|--------------------|-------------------|
| <i>C. ineffabilis</i><br>IMA082A | Acetone 80%  | 61,05 $\pm$ 3,58b | 82,96 $\pm$ 7,73c | 19,20 $\pm$ 1,20c     | 68,24 $\pm$ 2,67c | 18,28 $\pm$ 3,25b  | 1,08 $\pm$ 0,67a  |
|                                  | Methanol 50% | 61,57 $\pm$ 4,25b | 42,20 $\pm$ 5,16a | 1,09 $\pm$ 0,65a      | 1,07 $\pm$ 1,16a  | 10,90 $\pm$ 2,85a  | 13,69 $\pm$ 4,70b |
| <i>C. zucchelli</i><br>IMA088A   | Acetone 80%  | 46,21 $\pm$ 3,66a | 55,93 $\pm$ 7,24b | 16,74 $\pm$ 0,49b     | 38,25 $\pm$ 4,47b | 41,86 $\pm$ 4,58c  | 0,93 $\pm$ 0,36a  |
|                                  | Methanol 50% | 60,59 $\pm$ 4,05b | 65,12 $\pm$ 1,09b | 2,61 $\pm$ 1,39a      | 1,89 $\pm$ 2,61a  | 11,56 $\pm$ 2,27ab | 15,75 $\pm$ 1,17b |
| Galanthamine *                   |              | 91,31 $\pm$ 0.38c | 78.85 $\pm$ 2.72c |                       |                   |                    |                   |
| Acarbose **                      |              |                   |                   | 73.45 $\pm$ 1.00d     | 69.21 $\pm$ 3.43c |                    |                   |
| Orlistat *                       |              |                   |                   |                       |                   | 62.65 $\pm$ 3.14d  |                   |
| Arbutin *                        |              |                   |                   |                       |                   |                    | 91.36 $\pm$ 0.79c |
