# Supplementary material for: Bioprospection of the Antarctic Diatoms Craspedostauros ineffabilis IMA082A and Craspedostauros zucchelli IMA088A
Source: MDPI journal article supplement (doi:10.3390/md22010035), 2024-01-06
Supplement: s1 [file s1]

**Table S1.** Antioxidant activities of the acetone and methanol extracts of *C. ineffabilis* IMA082A and *C. zucchini* IMA088A. The results are expressed as antioxidant activity (% of activity) at the concentration of 10 mg/mL. For the same column, different letters indicate significant differences (Multiple Comparisons of Means: Tukey Contrast, 95% family-wise confidence level). Values represent the mean  $\pm$  standard error of mean (SEM) performed six times (n = 6); \* positive control tested at 1 mg/mL. <sup>1</sup> BHT: Butylated hydroxytoluene; <sup>2</sup> EDTA: ethylenediamine tetraacetic acid.

| Species                          | Extract      | DPPH              | ABTS              | FRAP              | CCA               | ICA                |
|----------------------------------|--------------|-------------------|-------------------|-------------------|-------------------|--------------------|
| <i>C. ineffabilis</i><br>IMA082A | Acetone 80%  | 14,55 $\pm$ 0,62d | 67,28 $\pm$ 4,41b | 26,33 $\pm$ 4,49b | 46,33 $\pm$ 3,51b | 85,05 $\pm$ 1,87c  |
|                                  | Methanol 50% | 6,96 $\pm$ 1,11b  | 42,58 $\pm$ 5,71a | 22,90 $\pm$ 3,03b | 24,86 $\pm$ 1,89a | 89,73 $\pm$ 9,36c  |
| <i>C. zucchini</i><br>IMA088A    | Acetone 80%  | 11,02 $\pm$ 1,85c | 36,24 $\pm$ 4,65a | 26,02 $\pm$ 4,41b | 26,84 $\pm$ 1,43a | 5,91 $\pm$ 2,59a   |
|                                  | Methanol 50% | 4,79 $\pm$ 0,94a  | 39,49 $\pm$ 5,29a | 13,37 $\pm$ 1,49a | 29,83 $\pm$ 7,42a | 26,81 $\pm$ 4,46b  |
| BHT * <sup>1</sup>               |              | 83,55 $\pm$ 0,79e | 94.44 $\pm$ 0,20c |                   |                   |                    |
| EDTA * <sup>2</sup>              |              |                   |                   |                   | 95,23 $\pm$ 0,41c | 96.08 $\pm$ 0,45cd |
